# Supplementary material for: Accountability Measures — Using Measurement to Promote Quality Improvement
Source: Atypon-hosted journal article supplement (doi:10.1056/nejmsb1002320), 2010-06-24
Supplement: nejmsb1002320_appendix.pdf [file nejmsb1002320_appendix.pdf]

## Supplementary Appendix

This appendix has been provided by the authors to give readers additional information about their work.

Supplement to: Chassin MR, Loeb JM, Schmalz SP, Wachter RM. Accountability measures — using measurement to promote quality improvement. *N Engl J Med* 2010;363:683-8.

Table A: Measures That Fail the Accountability Criteria

| Measure                                                              | Evidence       | Captures Process | Proximity | Adverse Consequences |
|----------------------------------------------------------------------|----------------|------------------|-----------|----------------------|
| <b>Acute Myocardial Infarction</b>                                   |                |                  |           |                      |
| AMI-4 Adult smoking cessation advice/counseling                      |                | X <sup>1</sup>   |           |                      |
| <b>Heart Failure</b>                                                 |                |                  |           |                      |
| HF-1 Discharge instructions                                          |                | X                |           |                      |
| HF-2 Evaluation of LVS function                                      |                |                  | X         |                      |
| HF-4 Adult smoking cessation advice/counseling                       |                | X                |           |                      |
| <b>Pneumonia</b>                                                     |                |                  |           |                      |
| PN-4 Adult smoking cessation advice/counseling                       |                | X                |           |                      |
| PN-5c Initial antibiotic received within 6 hours of hospital arrival | p <sup>2</sup> |                  |           | X                    |

1. X = measure fails this criterion
2. The level of evidence supporting this measure is provided largely by two retrospective studies and may not meet the higher level required by the evidence criterion.<sup>16</sup>

Table B: Measures Meeting All Accountability Criteria

**Acute Myocardial Infarction**

1. **AMI-1** Aspirin on arrival
2. **AMI-2** Aspirin prescribed at discharge
3. **AMI-3** ACEI or ARB for LVSD on discharge
4. **AMI-5** Beta blocker prescribed at discharge
5. **AMI-7a** Fibrinolytic therapy received within 30 minutes of hospital arrival
6. **AMI-8a** Primary PCI received within 90 minutes of hospital arrival

**Heart Failure**

7. **HF-3** ACEI or ARB for LVSD on discharge

**Pneumonia**

8. **PN-2** Pneumococcal vaccination
9. **PN-3b\*** For patients with blood cultures performed in the ED, cultures are done prior to initial antibiotic received
10. **PN-6** Initial antibiotic selection for CAP in immunocompetent patient
11. **PN-7** Influenza vaccination

**Surgical Care Improvement Project**

12. **SCIP-Inf-1a** Prophylactic antibiotic received within 1 hour prior to surgical incision
13. **SCIP-Inf-2a** Prophylactic antibiotic selection for surgical patients
14. **SCIP-Inf-3a** Prophylactic antibiotic discontinued within 24 hours after surgery
15. **SCIP-Inf-4** Cardiac surgery patients with controlled 6 a.m. postoperative blood glucose
16. **SCIP-Inf-6** Surgery patients with appropriate hair removal
17. **SCIP-Card-2** Surgery patients on beta-blocker therapy prior to arrival who received a beta-blocker during the perioperative period
18. **SCIP-VTE-1** Surgery patients with recommended venous thromboembolism prophylaxis ordered
19. **SCIP-VTE-2** Surgery patients who received appropriate venous thromboembolism prophylaxis within 24 hours prior to surgery to 24 hours after surgery

**Children's Asthma Care**

20. **CAC-1a** Relievers for inpatient asthma
21. **CAC-2a** Systemic corticosteroids for inpatient asthma
22. **CAC-3** Home management plan of care document given to patient/caregiver

\*Although this measure is listed here, a recent evidence review (Afshar N, Tabas J, Afshar K, et al. Blood cultures for community-acquired pneumonia: are they worthy of two quality measures? A systematic review. J Hosp Med 2009; 4:112-23) suggests that the level of evidence supporting it may be insufficient for it to remain an accountability measure.
